# Supplementary material for: Structure–Activity Relationship of Novel ACE Inhibitory Undecapeptides from Stropharia rugosoannulata by Molecular Interactions and Activity Analyses
Source: Foods. 2023 Sep 17;12(18):3461. doi: 10.3390/foods12183461 (PMC10529921; doi:10.3390/foods12183461)
Supplement: Supplementary file 1 [file foods-12-03461-s001.zip › Supplementary Table S1, S2 & S3-revised.xlsx]

## Sheet: Table S1
Table S1. The 82 undecapeptides of S. rugosoannulata identified by LC-MS/MS
Peptide	Mass	MS Area	Protein accession
AAHPDLPIHVH	1205.63	698900	A0A0D2LE38
AEAGVPPGVIQ	1036.56	1353300	A0A067TW94
AIQVDEPAIRE	1239.65	131730	A0A0D2PH32
APLFPKEPILQ	1251.72	3660000	A0A067T4F8
APYDPDWYYVR	1443.65	3178200	A0A409WG44
AVIKPPPETPF	1194.66	2759300	A0A0D2LNP0
AVLGRDGFLVG	1102.61	403330	A0A067THB1
AVSDPERVKIL	1225.7	4840000	A0A0D2L2A6
DDPQMPGLIPL	1194.6	580800	A0A0D2PFZ3
DIHSPRVPGSQ	1191.6	33266	A0A409WGR2
DIPVQGPYKPS	1199.62	10555000	A0A650FP37
DLDWDRIKSPA	1314.66	4953400	A0A409XSZ5
DYFFGDPIQNH	1351.58	233790	A0A0D2MEL4
DYPFKPPKVSF	1323.69	653070	A0A0D2MNC6
EQGNPGDNVGF	1132.48	11867000	A0A0D2LMI9
ERDIHPVVIIR	1345.78	144840	A0A0D2NJW9
FHDPDAIFRPF	1360.66	60258	A0A409WIP8
FNQIGRDIPTF	1306.67	1254300	A0A067TAT8
FNVPIQDGKIT	1230.66	2396000	A0A0D2LI57
FSNPVRQPLFE	1332.68	491110	A0A0D2KS26
FWRPADGNETS	1278.56	336560	A0A409XEB7
GDDAPRAVFPS	1130.54	1741900	A0A1L7NRR7
GDWPVKPITPL	1221.68	314870	A0A0D2P3S6
GFWKPGSGIIH	1197.63	3085900	A0A0D2ME14
GIDFNPLTRPL	1241.68	319720	A0A0D2KTF3
GIGTVPVGRVE	1082.61	63631000	A0A6B9VRY5
GILIPIPQYPL	1222.73	5139500	A0A0D2KIT6
GNIVDGIQRPL	1180.66	8973700	A0A409WI40
GPVSDFPTREW	1289.6	875050	A0A409XLX0
GQEDYDRLRPL	1360.67	67972000	A0A0D2NYJ3
HLGGEDFDNRL	1271.59	266560	A0A067TNR5
HTPGNWDHIIN	1302.61	1395900	A0A0D2P9E5
IDAIEPPVRPS	1192.65	28425000	A0A0D2LMI9
IGGHEGVGEII	1079.56	3731600	A0A0D2P3S6
KELIDPVMDKL	1299.71	1095000	A0A409WFZ1
KEVVVPVVGGH	1118.64	113640	A0A067T593
KGIVDSEDLPL	1184.63	3452800	A0A0D2P999
KKIRPDLPIVY	1340.82	6131700	A0A0D2PFZ3
KLIDLDDEKRY	1406.74	1061500	A0A067T9J8
KRFKFPENSLE	1393.74	386720	A0A409XD31
KSYELPDGQVI	1247.64	1983100	A0A1L7NRR7
KVIAGPPKEPF	1181.68	2983000	A0A067TYV8
KVKNPLDDLPK	1265.73	4975600	A0A067TE85
KVVLPGKDIEE	1225.69	250300	A0A0D2MDY1
LDEGETDWKVI	1303.63	4316400	A0A409WHR7
LIDSPGHVDFS	1185.57	59450000	A0A0D2LL89
LNRLPDAGVGD	1125.58	360060	A0A067SA10
LPPSWDAPTPQ	1207.59	1265700	A0A0D2LM27
LSIMPSNPKNF	1246.64	457640	A0A067SII1
LVHVPGSPQEE	1190.59	334200	A0A0D2PFZ3
NKSDGWDTEPF	1294.55	5925200	A0A0D2L9G7
QGVAAPDLRLT	1139.63	4548300	A0A0D2PFZ3
QHLYHPVPIEE	1360.68	293270	A0A0D2LFY1
QRIEDNLVIIR	1367.79	8588400	A0A0D2ME14
RAIDDGVNVIK	1198.67	893380	A0A067SII1
RETVVEVPTVT	1228.67	7762800	A0A409X3S3
RFITPPWPVEL	1353.74	110150	A0A067TJ08
RMLLPLVDVIF	1314.77	835610	A0A0D2LAA6
RSVSIPAPVYY	1250.67	3271300	A0A067TUS3
RSVSLPAPVYY	1250.67	3271300	A0A067T300
RVAPEEHPVLL	1258.7	7102000	A0A1L7NRR7
SEFPLRPIGKF	1289.71	6456200	A0A0D2PA98
SIDHLPTLLPR	1260.72	728410	A0A067SXA1
SITPDTKLPGW	1213.63	4303300	A0A067SP42
SLPIKPRVPFS	1239.73	6655000	A0A0D2MBH0
SRANLPGADDL	1127.56	819670	A0A067SD97
SVDFQPPSTGL	1146.56	351270	A0A409XEB7
TDLPSRLPTQS	1213.63	2701800	A0A0D2PEU9
TELPPTHPIRL	1272.72	1159700	A0A067TYE2
TERIKPVVIIN	1280.78	3552700	A0A0D2LL89
TFQPGTKPPVV	1169.64	9511200	A0A409VNQ6
TNDWEDHLAVK	1326.62	1429600	A0A0D2P999
TYIGLPPIINF	1246.7	342540	A0A0D2P2G0
VDFNVPIQDGK	1230.62	714140	A0A0D2LI57
VDIGIPDPTGR	1138.6	328660	A0A409X3S3
VGRHPFPGPGL	1132.61	623000	A0A409WGJ0
VIKPPPETPFS	1210.66	2588600	A0A0D2LNP0
WTRNPSDITPE	1314.62	2657700	A0A0D2P999
YDVLYPDETAK	1312.62	1332900	A0A0D2PND5
YKPGQTPGSVL	1145.61	5258200	A0A409X683
YRHPADDIFIN	1359.66	654720	A0A067SP42
YVWIDGDGGLR	1249.61	1328100	A0A409XT46

## Sheet: Table S2
Table S2. Undecapeptides of S. rugosoannulata with ACE inhibitory activity obtained based on screening and prediction
Peptide	Mass	MS Area	Protein accession	ACE inhibited peptide segments predicted by BIOPEP-UWM	Predicted values of blood-brain barrier penetration	Predicted values of human intestinal absorption properties	Predicted values of Caco-2 cell penetration	Predicted values of AMES toxicity	Gastrointestinal simulation of digestive enzyme action sites
LDEGETDWKVI	1303.63	4316400	A0A409WHR7	GE, EG	0.9318	0.964	0.8275	0.8548	L - DEGETDWK - VI
KVKNPLDDLPK	1265.73	4975600	A0A067TE85	PL, DLP, VK, LP	0.9881	0.5798	0.8487	0.8696	K - VK - NPL - DDL - PK
QRIEDNLVIIR	1367.79	8588400	A0A0D2ME14	IR, IE	0.8235	0.5336	0.7015	0.6671	QR - IEDNL - VIIR
LVHVPGSPQEE	1190.59	334200	A0A0D2PFZ3	VP, GS, PG, PQ	0.99	0.5177	0.8585	0.8167	L - VHVPGSPQEE
DDPQMPGLIPL	1194.6	580800	A0A0D2PFZ3	PGL, PL, IP, GL, PG, PQ	0.9826	0.7405	0.7774	0.8659	DDPQMPGL - IPL
YDVLYPDETAK	1312.62	1332900	A0A0D2PND5	LY, YP, LYP, VLY	0.9934	0.7551	0.8496	0.8971	YDVL - YPDETAK
TNDWEDHLAVK	1326.62	1429600	A0A0D2P999	VK, LA, HL, AV	0.8877	0.9147	0.8427	0.8289	TNDWEDHL - AVK
KVVLPGKDIEE	1225.69	250300	A0A0D2MDY1	VLP, LPG, GK, PG, IE, VVL, LP	0.9846	0.5954	0.8256	0.9	K - VVL - PGK - DIEE
HLGGEDFDNRL	1271.59	266560	A0A067TNR5	RL, HL, GE, GG, LG, DF	0.9756	0.7496	0.7942	0.7426	HL - GGEDF - DNR - L
QHLYHPVPIEE	1360.68	293270	A0A0D2LFY1	LY, VP, HL, IE, HP, YH	0.997	0.8265	0.8746	0.8827	QHL - YHPVPIEE
YRHPADDIFIN	1359.66	654720	A0A067SP42	IF, HP	0.9922	0.8839	0.8505	0.7499	YR - HPADDIF - IN
KGIVDSEDLPL	1184.63	3452800	A0A0D2P999	PL, DLP, GI, KG, LPL, LP	0.981	0.5715	0.8135	0.8816	K - GIVDSEDL - PL
GQEDYDRLRPL	1360.67	67972000	A0A0D2NYJ3	RL, LRP, PL, RP, GQ, DY, LR, DR	0.9895	0.6523	0.809	0.7866	GQEDYDR - L - R - PL
RVAPEEHPVLL	1258.7	7102000	A0A1L7NRR7	VAP, AP, HP, VAPEEHPV	0.9859	0.5568	0.8162	0.7645	R - VAPEEHPVL - L
RAIDDGVNVIK	1198.67	893380	A0A067SII1	RA, GV, AI, DG	0.9124	0.5277	0.7022	0.6992	R - AIDDGVNVIK
SRANLPGADDL	1127.56	819670	A0A067SD97	LPG, RA, GA, PG, LP	0.9738	0.6842	0.7602	0.7269	SR - ANL - PGADDL
GDDAPRAVFPS	1130.54	1741900	A0A1L7NRR7	VF, FP, PR, VFPS, AP, RA, DA, GD, AV	0.9874	0.6847	0.8026	0.7397	GDDAPR - AVF - PS
SEFPLRPIGKF	1289.71	6456200	A0A0D2PA98	FP, LRP, PL, RP, IG, GK, KF, LR, EF	0.9924	0.7761	0.8155	0.7538	SEF - PL - R - PIGK - F
RSVSLPAPVYY	1250.67	3271300	A0A067T300	VY, AP, PAP, YY, LP	0.9922	0.6321	0.7966	0.7255	R - SVSL - PAPVYY
GNIVDGIQRPL	1180.66	8973700	A0A409WI40	PL, RP, GI, DG	0.9859	0.6514	0.7759	0.747	GNIVDGIQR - PL
AVSDPERVKIL	1225.7	4840000	A0A0D2L2A6	VK, AV, IL, ER	0.976	0.5484	0.763	0.7422	AVSDPER - VK - IL
FWRPADGNETS	1278.56	336560	A0A409XEB7	RP, DG	0.9721	0.8038	0.8754	0.701	F - WR - PADGNETS
FHDPDAIFRPF	1360.66	60258	A0A409WIP8	RP, FR, IF, DA, AI	0.9933	0.8441	0.8438	0.7563	F - HDPDAIF - R - PF
FSNPVRQPLFE	1332.68	491110	A0A0D2KS26	LF, PL, VR, QP	0.9929	0.6516	0.8222	0.7369	F - SNPVR - QPL - F - E
IDAIEPPVRPS	1192.65	28425000	A0A0D2LMI9	VRP, RP, DA, AI, VR, IE, PP, IEP	0.9794	0.5279	0.7709	0.7331	IDAIEPPVR - PS
RMLLPLVDVIF	1314.77	835610	A0A0D2LAA6	LLP, PL, IF, LPL, LP	0.9916	0.8819	0.7635	0.7775	R - ML - L - PL - VDVIF
DIHSPRVPGSQ	1191.6	33266	A0A409WGR2	PR, VP, GS, PG	0.9871	0.7717	0.8121	0.7225	DIHSPR - VPGSQ

## Sheet: Table S3
Table S3. Binding energy of undecapeptides with the active amino acid residues in the ACE receptor's pockets
Peptide	Binding energy (kcal/mol)
	S1			S2					S1'
	ALA354	GLU384	TYR523	GLN281	HIS353	HIS513	LYS511	TYR520	GLU162
AVSDPERVKIL	-	-	-	-	-	-	-	-	-12.4, -1.1, -4.5
DDPQMPGLIPL	-0.5	-	-	-	-	-	-	-	-
DIHSPRVPGSQ	-2.9	-1.1, -0.7	-	-	-2.8	-	-	-	-
FHDPDAIFRPF	-0.5	-	-	-	-6.2	-4.2	-	-	-
FSNPVRQPLFE	-	-	-	-	-5.8	-	-	-	-
FWRPADGNETS	-1.0, -0.7	-	-	-1.1	-	-	-	-	-
GDDAPRAVFPS	-	-1.1	-	-	-	-	-	-	-
GNIVDGIQRPL	-	-21.3, -5.7	-	-	-	-	-	-	-
GQEDYDRLRPL	-	-2.1	-	-	-	-3.4	-15.4, -5.1	-	-3.3, -1.5, -5.5, -4.0, -5.5
HLGGEDFDNRL	-	-1.0	-	-	-	-	-	-	-10.6, -3.7
IDAIEPPVRPS	-2.5	-	-	-	-8.1	-	-	-	-
KGIVDSEDLPL	-0.5	-	-	-	-	-0.7	-	-	-0.9
KVKNPLDDLPK	-1.3	-	-0.5	-1.1	-	-1.3	-	-	-1.3
KVVLPGKDIEE	-	-	-	-	-3.7	-	-	-	-
LDEGETDWKVI	-0.8	-	-	-1.0	-1.0	-3.1	-1.0, -7.0, -3.4, -4.8	-	-
LVHVPGSPQEE	-2.6	-0.8, -0.6, -0.9	-	-	-2.5, -1.0	-2.4, -0.7	-4.3, -1.9, -5.5	-	-
QHLYHPVPIEE	-1.6	-0.5, -0.5, -5.0	-	-	-	-	-	-	-
QRIEDNLVIIR	-	-5.0, -5.4	-	-	-	-	-	-	-
RAIDDGVNVIK	-	-	-	-2.9	-2.2	-	-	-	-1.2, -0.5, -3.9, -2.2, -0.5, -4.5
RMLLPLVDVIF	-	-	-	-	-3.2	-	-	-	-5.7, -4.7, -4.6, -5.4
RSVSLPAPVYY	-	-0.5	-0.5	-1.9	-	-1.2	-14.3, -5.2	-	-
RVAPEEHPVLL	-2.6	-	-	-	-	-2.0	-	-	-0.7, -5.3
SEFPLRPIGKF	-	-	-	-2.3	-	-2.8	-11.7, -3.7	-	-0.8, -4.3
SRANLPGADDL	-5.4	-	-	-	-	-	-	-	-
TNDWEDHLAVK	-	-1.8, -1.5	-	-	-	-	-	-	-
YDVLYPDETAK	-	-	-0.5	-	-	-	-2.9, -5.4	-	-
YRHPADDIFIN	-	-1.3	-	-	-1.0	-2.8	-	-	-0.5
Note: "-" represents no docking information
