# Supplementary figures and images for: Structure–Activity Relationship of Novel ACE Inhibitory Undecapeptides from Stropharia rugosoannulata by Molecular Interactions and Activity Analyses
Source: MDPI journal article supplement (doi:10.3390/foods12183461), 2023-09-17

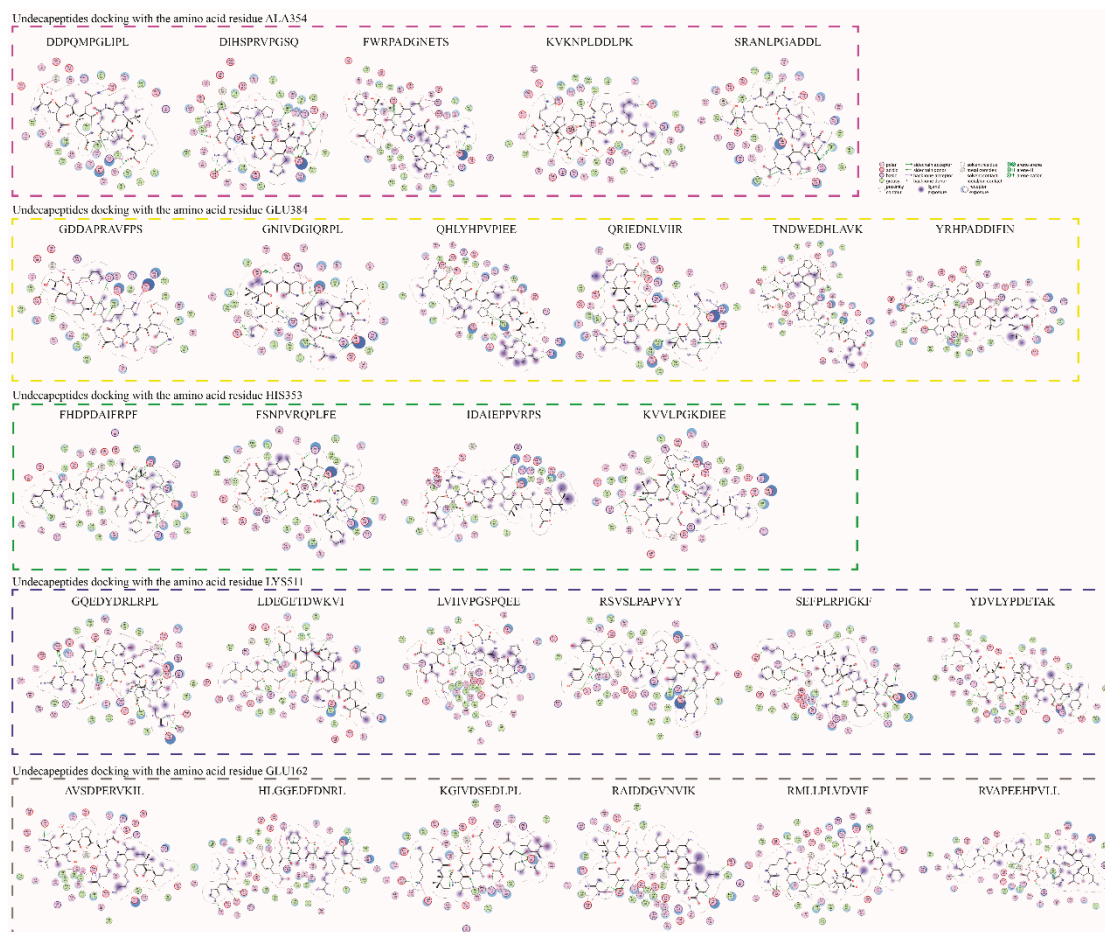

**Figure S1.** 2D interaction plots of the 27 *S. rugosoannulata* undecapeptides to the ACE receptors

Supplement: s1 [file s1]
